# Supplementary material for: Strategies for organelle targeting of fluorescent probes
Source: Royal Society of Chemistry journal article supplement (doi:10.1039/d1ob01447a), 2021-01-01
Supplement: d1ob01447a1.pdf [file d1ob01447a1.pdf]

Electronic supplementary information for

# Strategies for organelle targeting of fluorescent probes

Jiarun Lin <sup>1,2</sup>, Kylie Yang <sup>1</sup>, and Elizabeth J. New <sup>1,2,3,\*</sup>

<sup>1</sup> School of Chemistry, The University of Sydney, NSW 2006, Australia

<sup>2</sup> The University of Sydney Nano Institute (Sydney Nano), The University of Sydney, NSW 2006, Australia

<sup>3</sup> Australian Research Council Centre of Excellence for Innovations in Peptide and Protein Science, The University of Sydney, NSW 2006, Australia

\* elizabeth.new@sydney.edu.au

# Nucleus

Table S1: Targeting groups for genetically expressed fluorescent cargo to the nucleus

| Structure of targeting group     | Class of targeting group            | Mechanism                                                                                                      | Cargo / Examples                                                                         | Selectivity                                             |
|----------------------------------|-------------------------------------|----------------------------------------------------------------------------------------------------------------|------------------------------------------------------------------------------------------|---------------------------------------------------------|
| PKKKRKV, NLS from SV40 T antigen | Nuclear localisation sequence (NLS) | Signal peptide is recognised by nuclear import proteins (importins).                                           | Fluorescent proteins, including GFP, <sup>1</sup> RFP, <sup>2</sup> CFP. <sup>3</sup>    | Selective for nucleus, also used in commercial products |
| Histone 2B                       | Protein                             | Cargo is attached to native nucleus-targeted protein.                                                          | Fluorescent proteins, including GFP, <sup>4</sup> RFP, <sup>5</sup> GFP 11. <sup>6</sup> | Selective for nucleus, also used in commercial products |
| Hoescht                          | Minor groove binder                 | Localisation of eDHFR-GFP can be altered after subsequent binding to a Hoechst labelled trimethoprim (hoeTMP). | Genetically expressed eDHFR-GFP. <sup>7</sup>                                            | Selective for nucleus.                                  |

Table S2: Targeting groups for exogenous fluorescent cargo to the nucleus

| Structure of targeting group | Class of targeting group         | Mechanism                                                                          | Cargo / Examples                                                                                                                                                               | Selectivity                                                                                                              |
|------------------------------|----------------------------------|------------------------------------------------------------------------------------|--------------------------------------------------------------------------------------------------------------------------------------------------------------------------------|--------------------------------------------------------------------------------------------------------------------------|
| Hoescht                      | Minor groove binder              | Binds to double-stranded DNA                                                       | Small molecule fluorophores <i>e.g.</i> sulforhodamine, <sup>8</sup> various xanthenes, <sup>9</sup> rhodamine, <sup>10</sup> fluorescein, <sup>10</sup> BODIPY. <sup>10</sup> | Selective for nucleus                                                                                                    |
| (pyridin-4-yl)piperazine     | Minor groove binder              | Hoechst mimic. Binds to double-stranded DNA.                                       | Coumarin. <sup>11</sup>                                                                                                                                                        | Selective for nucleus in red channel. Staining of LDs was seen in blue channel due to ratiometric emission of the probe. |
| Pyrrole polyamide            | Minor groove binder              | Binds to double-stranded DNA                                                       | Fluorescein. <sup>12</sup>                                                                                                                                                     | Nucleus strongly stained; some spots outside nucleus also stained.                                                       |
| KKKRK (SV40 T antigen)       | NLS                              | Signal peptide is recognised by nuclear import proteins (importins).               | BODIPY. <sup>13</sup>                                                                                                                                                          | Plasma membrane must be punctured for the molecule to reach the nucleus.                                                 |
| VQRKRQKLMP (NLS50)           | NLS                              | Signal peptide is recognised by nuclear import proteins (importins).               | Carboxyfluorescein, <sup>14</sup> naphthalimide. <sup>15</sup>                                                                                                                 | Generally selective for nucleus.                                                                                         |
| YKQCHKKGGK KGSG              | Nucleolus targeting peptide NrTP | Unknown, although clathrin mediated uptake is involved.                            | Carboxyfluorescein. <sup>14</sup>                                                                                                                                              | Generally selective for nucleolus.                                                                                       |
| R <sub>8</sub>               | NLS peptide mimic                | Positively charged peptides are likely to be recognized by importins.              | PyTPE. <sup>16</sup>                                                                                                                                                           | Generally selective for nucleus.                                                                                         |
| RRRRKR                       | NLS peptide mimic                | Positively charged peptides are likely to be recognized by importins.              | PyTPE. <sup>17</sup>                                                                                                                                                           | Generally selective for nucleus.                                                                                         |
| polyethylenimine             | Multivalent polyamine            | Multivalent polyamines bind to and neutralise the negatively charged DNA backbone. | FITC. <sup>18</sup>                                                                                                                                                            | Nuclear localisation and weak cytoplasmic localisation in digitonin permeabilised cells                                  |

# Mitochondria

Table S3: Targeting groups for endogenous fluorescent cargo to the mitochondria

| Structure of targeting group               | Class of targeting group | Mechanism                                                                                                 | Cargo / Examples                                          | Selectivity                |
|--------------------------------------------|--------------------------|-----------------------------------------------------------------------------------------------------------|-----------------------------------------------------------|----------------------------|
| N-terminal 12 aa of pre-sequence of COX IV | MTS                      | Pre-sequence interacts with mitochondrial import receptors and is cleaved after import into mitochondria. | Fluorescent proteins, including ECFP, EYFP. <sup>19</sup> | Selective for mitochondria |
| Pre-sequence of COX VIII                   | MTS                      | Pre-sequence interacts with mitochondrial import receptors and is cleaved after import into mitochondria. | GFP. <sup>20</sup>                                        | Selective for mitochondria |
| Mff                                        | Protein                  | Cargo is attached to Mff, a native mitochondrial outer membrane protein                                   | GFP. <sup>21</sup>                                        | Selective for mitochondria |

COX = cytochrome c oxidase, Mff = Mitochondrial fission factor, MTS = mitochondrial targeting sequence.

Table S4: Targeting groups for exogenous fluorescent cargo to the mitochondria

| Structure of targeting group                     | Class of targeting group | Mechanism                                                                                                                     | Cargo / Examples                                                                                                                                                                                                                                           | Selectivity                                                             |
|--------------------------------------------------|--------------------------|-------------------------------------------------------------------------------------------------------------------------------|------------------------------------------------------------------------------------------------------------------------------------------------------------------------------------------------------------------------------------------------------------|-------------------------------------------------------------------------|
| Rhodamine                                        | DLC                      | Passive diffusion and accumulation to negatively charged mitochondrial membrane.                                              | Rhodamine 123. <sup>22</sup>                                                                                                                                                                                                                               | Selective for mitochondria                                              |
| Rosamine                                         | DLC                      | Passive diffusion and accumulation to negatively charged mitochondrial membrane.                                              | MitoTracker Orange, <sup>23</sup> MitoTracker Red. <sup>24, 25</sup>                                                                                                                                                                                       | Selective for mitochondria                                              |
| Cyanine                                          | DLC                      | Passive diffusion and accumulation to negatively charged mitochondrial membrane.                                              | MitoTracker Deep Red. <sup>25, 26</sup>                                                                                                                                                                                                                    | Selective for mitochondria                                              |
| TPP                                              | DLC                      | Passive diffusion and accumulation to negatively charged mitochondrial membrane.                                              | Small molecule fluorophores including naphthalimide, <sup>27</sup> BODIPY, <sup>28</sup> fluorescein, <sup>29</sup> flavin, <sup>30</sup> etc. Nanomaterials include quantum dots, <sup>31</sup> nanoparticles, <sup>32</sup> liposomes <sup>33</sup> etc. | Selective for mitochondria                                              |
| F16                                              | DLC                      | Passive diffusion and accumulation to negatively charged mitochondrial membrane.                                              | BODIPY. <sup>34</sup>                                                                                                                                                                                                                                      | Selective for mitochondria                                              |
| Methyl-substituted TPP                           | DLC                      | Passive diffusion and accumulation to negatively charged mitochondrial membrane.                                              | Hexachloro-fluorescein. <sup>35</sup>                                                                                                                                                                                                                      | Selective for mitochondria                                              |
| CF <sub>3</sub> -substituted TPP                 | DLC                      | Passive diffusion and accumulation to negatively charged mitochondrial membrane.                                              | TAMRA. <sup>36</sup>                                                                                                                                                                                                                                       | Selective for mitochondria                                              |
| SS peptide (4 aa, alternating aromatic/cationic) | MPP                      | Not fully elucidated, but some variants target cardiolipin. Others via mechanism not involving receptor mediated endocytosis. | [Dmt <sup>1</sup> ,Dap(atn) <sup>4</sup> ]DALDA, [Dmt <sup>1</sup> ,Dap(dns) <sup>4</sup> ]DALDA; <sup>37</sup> [aladan]SS-31. <sup>38</sup>                                                                                                               | Selective for mitochondria, can penetrate inner mitochondrial membrane. |
| MPP (alternating hydrophobic and cationic)       | MPP                      | Not fully elucidated, but it is possible to target different compartments of the mitochondria.                                | Thiazole orange, 2-aminobenzoic acid; <sup>39</sup> TAMRA. <sup>40</sup>                                                                                                                                                                                   | Selective for mitochondria                                              |

TPP = triphenylphosphonium, TAMRA = carboxytetramethylrhodamine, F16 = ((E)-4-(1 H-indol-3-ylvinyl)-N-methylpyridinium iodide, SS = Szeto-Schiller, MPP = mitochondrial penetrating peptide, DLC delocalised lipophilic cation.

# Lysosome

Table S5: Targeting groups for endogenous fluorescent cargo to the lysosome

| Structure of targeting group | Class of targeting group | Mechanism                                                | Cargo / Examples                                                                         | Selectivity                                                                   |
|------------------------------|--------------------------|----------------------------------------------------------|------------------------------------------------------------------------------------------|-------------------------------------------------------------------------------|
| LAMP1                        | Protein                  | Cargo is attached to a native lysosomal membrane protein | Fluorescent proteins, including GFP, <sup>41</sup> RFP, <sup>42</sup> YFP. <sup>43</sup> | Generally selective for lysosomes, may be found in other digestive organelles |
| LAMP2                        | Protein                  | Cargo is attached to a native lysosomal membrane protein | GFP, mCherry. <sup>44, 45</sup>                                                          | Generally selective for lysosomes, may be found in other digestive organelles |

LAMP = Lysosome-associated membrane glycoprotein

Table S6: Targeting groups for exogenous fluorescent cargo to the lysosome

| Structure of targeting group | Class of targeting group | Mechanism                                                                                      | Cargo / Examples                                                                                                                                                                                  | Selectivity                                      |
|------------------------------|--------------------------|------------------------------------------------------------------------------------------------|---------------------------------------------------------------------------------------------------------------------------------------------------------------------------------------------------|--------------------------------------------------|
| Morpholines                  | Tertiary amine           | Passive diffusion and protonation in acidic lumen of lysosome.                                 | Naphthalimide (LysoSensor Green). <sup>25</sup>                                                                                                                                                   | Selective for acidic lysosomes.                  |
| Dimethylamine                | Tertiary amine           | Passive diffusion and protonation in acidic lumen of lysosome.                                 | BODIPY (LysoTracker Red and LysoTracker Green). <sup>25</sup>                                                                                                                                     | Selective for acidic lysosomes.                  |
| Diethylamine                 | Tertiary amine           | Passive diffusion and protonation in acidic lumen of lysosome.                                 | Rhodamine. <sup>46</sup>                                                                                                                                                                          | Selective for acidic lysosomes.                  |
| DAMP                         | Tertiary amine           | Passive diffusion and protonation in acidic lumen of lysosome.                                 | Nonfluorescent-activity based probes that later reacted with AlexaFluor 488. <sup>47</sup>                                                                                                        | Selective for acidic lysosomes.                  |
| Histamine                    | Tertiary amine           | Passive diffusion and protonation in acidic lumen of lysosome.                                 | BODIPY FL histamine. <sup>25</sup>                                                                                                                                                                | Selective for acidic lysosomes.                  |
| N-linked glycans             | Glycosylation            | Unknown                                                                                        | Rhodamine spirolactam derivatives. <sup>48, 49</sup>                                                                                                                                              | Selective for lysosomes (coloc with LysoTracker) |
| Methylcarbitol               | Neutral                  | Unknown                                                                                        | Rhodamine spirolactam, <sup>50, 51</sup> carbazole-benzimidazole, <sup>52</sup> ethanoylcarbazole and terephthalaldehyde, <sup>53</sup> rhodamine fused with tetrahydroquinoxaline. <sup>54</sup> | Selective for lysosomes.                         |
| CPP + epoxysuccinyl          | Cathepsin targeting      | CPP improves permeability; epoxysuccinyl scaffold forms covalent bond with cysteine cathepsin. | 5(6)-carboxyfluorescein, rhodamine B; <sup>55</sup> , Alexa Fluor 647, Atto 565, and Atto 488; <sup>56</sup> FITC, rhodamine B, photo-activatable rhodamine B derivative. <sup>57</sup>           | Selective for lysosomes.                         |
| Albumin / dextran            | Macromolecules           | Macromolecules cannot diffuse in the cell and are uptaken via endocytosis.                     | FITC-dextran. <sup>58</sup>                                                                                                                                                                       | Tracks progress of endocytosis.                  |

DAMP = (N-(3-((2,4-dinitrophenyl)amino)propyl)-N-(3-aminopropyl)methylamine, dihydrochloride), CPP = cell penetrating peptide, FITC = fluorescein isothiocyanate

## Digestive organelles

Table S7: Targeting groups for endogenous fluorescent cargo to endosome related vesicles.

| Structure of targeting group | Class of targeting group | Mechanism                                                 | Cargo / Examples                         | Selectivity                                                                   |
|------------------------------|--------------------------|-----------------------------------------------------------|------------------------------------------|-------------------------------------------------------------------------------|
| Rab5                         | Protein                  | Cargo is attached to a native early endosome protein.     | GFP, <sup>59</sup> RFP. <sup>60</sup>    | Selective for early endosomes.                                                |
| Rab7                         | Protein                  | Cargo is attached to a native late endosome protein.      | GFP, <sup>61</sup> RFP. <sup>62</sup>    | Generally selective for late endosomes, but also found in other compartments. |
| Rab11                        | Protein                  | Cargo is attached to a native recycling endosome protein. | GFP, <sup>63</sup> EGFP. <sup>64</sup>   | Selective for recycling endosomes.                                            |
| EEA1                         | Protein                  | Cargo is attached to a native early endosome protein.     | GFP, photoactivatable GFP. <sup>65</sup> | Selective for early endosomes.                                                |
| Transferrin receptor         | Protein                  | Cargo is attached to a native recycling endosome protein. | mCherry. <sup>66</sup>                   | Selective for recycling endosomes.                                            |
| Arf6                         | Protein                  | Cargo is attached to a native recycling endosome protein. | GFP. <sup>67</sup>                       | Selective for recycling endosomes.                                            |

Rab = Ras analog in brain, EEA = early endosome antigen, Arf = ADP-ribosylation factor.

Table S8: Targeting groups for exogenous fluorescent cargo to endosome related vesicles.

| Structure of targeting group            | Class of targeting group | Mechanism                                                                                                                         | Cargo / Examples                           | Selectivity                                                                                                                         |
|-----------------------------------------|--------------------------|-----------------------------------------------------------------------------------------------------------------------------------|--------------------------------------------|-------------------------------------------------------------------------------------------------------------------------------------|
| Weakly acidic benzyl substituted amines | Modified tertiary amine  | Passive diffusion and protonation in less acidic lumen of endosomes.                                                              | Fluorescent 'flipper' probe. <sup>68</sup> | Variants with higher $pK_a$ values in the less acidic early endosomes; those with lower $pK_a$ values in more acidic late endosomes |
| macrocyclic di(cyclo-squaramides).      | Endocytosis related      | Bind to phosphates on the outer cell membrane and are then internalised through the cell <i>via</i> receptor-mediated endocytosis | BODIPY, fluorescein. <sup>69</sup>         | Selective for late endosomes                                                                                                        |
| naphthylmethyl piperazine               | Tertiary amine           | pH partitioning; can stain pH flux from late endosome to lysosome                                                                 | BODIPY. <sup>70</sup>                      | Sensitive to flux in pH from late endosomes to the lysosome                                                                         |
| DiIC <sub>16</sub> (3)                  | Lipid stain              | Unknown                                                                                                                           | Silicon-rhodamine. <sup>71</sup>           | Selective for late endosomes                                                                                                        |

Table S9: Targeting groups for endogenous fluorescent cargo to autophagy related vesicles

| Structure of targeting group | Class of targeting group | Mechanism                                                                      | Cargo / Examples                             | Selectivity                                                                            |
|------------------------------|--------------------------|--------------------------------------------------------------------------------|----------------------------------------------|----------------------------------------------------------------------------------------|
| WIPI1/2                      | Protein                  | Cargo is attached to an ATG protein, associated before autophagosome closes.   | GFP. <sup>72</sup>                           | Selective for open phagophores, useful for differentiating stages of autophagy.        |
| ATG12-ATG5-ATG16             | Protein                  | Cargo is attached to an ATG protein, associated before autophagosome closes.   | GFP, mCherry. <sup>73</sup>                  | Selective for phagophores                                                              |
| ULK1                         | Protein                  | Cargo is attached to an ATG protein, associated before autophagosome closes.   | GFP. <sup>74</sup>                           | Selective for phagophores                                                              |
| LC3                          | Protein                  | Cargo is attached to an ATG protein, associated with most autophagy stages.    | GFP, mRFP-GFP-LC3. <sup>75</sup>             | Selective for most stages of autophagy. Note that GFP is quenched in acidic conditions |
| STX17                        | Protein                  | Cargo is attached to an ATG protein, associated with the closed autophagosome. | GFP, <sup>76</sup> Turquoise2. <sup>77</sup> | Selective for autophagosomes – autolysosomes.                                          |

WIPI = WD repeat domain phosphoinositide-interacting protein 1, ATG = autophagy related protein, ULK1 = Unc-51 Like Autophagy Activating Kinase 1, LC3 = Microtubule-associated protein 1A/1B-light chain 3, STX = syntaxin

Table S10: Targeting groups for exogenous fluorescent cargo to autophagy related vesicles

| Structure of targeting group | Class of targeting group    | Mechanism                                                                                                                          | Cargo / Examples                                                                      | Selectivity                                                               |
|------------------------------|-----------------------------|------------------------------------------------------------------------------------------------------------------------------------|---------------------------------------------------------------------------------------|---------------------------------------------------------------------------|
| Unknown                      | Cationic amphiphilic tracer | Unknown                                                                                                                            | Cyto-ID. <sup>78</sup>                                                                | Selective for autophagic compartments.                                    |
| Piperazine                   | Amphiphilic detergent       | Unknown; alkyl chain with terminal amino may contribute to uptake                                                                  | DALGreen (naphthalimide). <sup>79</sup>                                               | Selective for all autophagic compartments.                                |
| Aminopentyl                  | Amphiphilic detergent       | Unknown; alkyl chain with terminal amino may contribute to uptake                                                                  | DAPGreen (naphthalimide). <sup>79</sup>                                               | pH dependent; stains flux and is more fluorescent in late-stage autophagy |
| Morpholine                   | Tertiary amine              | Passive diffusion and protonation in acidic lumen of lysosomes. Fluorescence response to pH flux after fusion with autophagosomes. | Coumarin, <sup>80</sup> p-methoxyphenylacetylene-substituted carbazole. <sup>81</sup> | Sensitive to autophagic flux from lysosome to autolysosome.               |

# Peroxisomes

Table S11: Targeting groups for endogenous fluorescent cargo to peroxisomes

| Structure of targeting group | Class of targeting group | Mechanism                      | Cargo / Examples                                                     | Selectivity                                                       |
|------------------------------|--------------------------|--------------------------------|----------------------------------------------------------------------|-------------------------------------------------------------------|
| PTS-1 (AKL or SKL)           | Peptide                  | Active transport by peroxin 5. | GFP, <sup>82, 83</sup> fluorescent calcium sensor. <sup>83, 84</sup> | Selective for peroxisomes (including use in commercial products). |

PTS = peroxisome targeting signal

Table S12: Targeting groups for exogenous fluorescent cargo to peroxisomes

| Structure of targeting group | Class of targeting group | Mechanism                      | Cargo / Examples                                                 | Selectivity               |
|------------------------------|--------------------------|--------------------------------|------------------------------------------------------------------|---------------------------|
| PTS-1 (C-terminal AKL)       | Peptide                  | Active transport by peroxin 5. | fluorescein, BODIPY, pH-sensor SNAFL-2, C2-BODIPY. <sup>85</sup> | Selective for peroxisomes |

## Endoplasmic reticulum

Table S13: Targeting groups for endogenous fluorescent cargo to the endoplasmic reticulum.

| Structure of targeting group                                      | Class of targeting group               | Mechanism                                                                                                  | Cargo / Examples                      | Selectivity      |
|-------------------------------------------------------------------|----------------------------------------|------------------------------------------------------------------------------------------------------------|---------------------------------------|------------------|
| Upstream prolactin secretory sequence and KDEL retention sequence | Signal peptide and ER retention signal | Signal sequence targets the ER lumen whilst KDEL prevents the protein moving to the Golgi apparatus        | GFP. <sup>86</sup>                    | Selective for ER |
| signal sequence of calreticulin and KDEL retention sequence       | Signal peptide and ER retention signal | Uses endogenous protein targeting mechanism whilst KDEL prevents the protein moving to the Golgi apparatus | GFP, <sup>87</sup> RFP. <sup>88</sup> | Selective for ER |

Table S14: Targeting groups for exogenous fluorescent cargo to the endoplasmic reticulum.

| Structure of targeting group                                            | Class of targeting group | Mechanism                                                                                                                         | Cargo / Examples                                                                                                                                                                                                                                                                                                | Selectivity                                 |
|-------------------------------------------------------------------------|--------------------------|-----------------------------------------------------------------------------------------------------------------------------------|-----------------------------------------------------------------------------------------------------------------------------------------------------------------------------------------------------------------------------------------------------------------------------------------------------------------|---------------------------------------------|
| Signal peptide (KDEL)                                                   | Peptide                  | The fluorescent peptide passively enters the cell and KDEL retains the protein inside the endoplasmic reticulum                   | BODIPY. <sup>13</sup>                                                                                                                                                                                                                                                                                           | Selective to ER                             |
| Glibenclamide                                                           | Sulfonylurea             | Binding to the sulfonylurea receptor in the ER                                                                                    | naphthalimide-based Zn sensor, <sup>89</sup> BODIPY (ER-Tracker™ Red). <sup>25</sup>                                                                                                                                                                                                                            | Selective to ER                             |
| methyl sulphonamide (i.e. <i>p</i> -toluene-sulfonamide, sulfanilamide) | Sulfonylamide            | Analogue of sulfonylurea compounds that likely bind to the K <sup>+</sup> channel related proteins which are mainly located in ER | Amino-NBD conjugated to diethylamino coumarin, <sup>90</sup> 1,8-naphthalimide conjugated to benzothiazoline, <sup>91</sup> 4-nitro-1,8-naphthamimide, <sup>92</sup> 4-azido-1,8 naphthalimide, <sup>93</sup> 4-methylthio naphthalimide, <sup>94</sup> ER-Tracker Blue-White DPX (also has PFP). <sup>25</sup> | Selective to ER                             |
| Ethylene glycol                                                         | Lipophilic chain         | Thought to take advantage of tendency of lipophilic or glycosylated compounds to localise in ER.                                  | Naphthalimide <sup>95</sup>                                                                                                                                                                                                                                                                                     | Similar structure used for other organelles |
| Alkyl chain linker                                                      | Lipophilic chain         | Thought to take advantage of tendency of lipophilic or glycosylated compounds to localise in ER                                   | BODIPY-coumarin, <sup>96</sup> BODIPY-Nile Red <sup>97</sup>                                                                                                                                                                                                                                                    | Similar structure used for other organelles |
| Pentafluorophenyl (PFP)                                                 | Covalent bond            | Reacts with thiols in ER proteins, but often used with other moieties or probe structures that may be more directing to the ER.   | ER Tracker Blue White (contains sulfonamide), Nile Red derivative (+ ethylene glycol chain) <sup>98</sup> fluorescent flipper (+ ethylene glycol chain) <sup>99</sup> , BODIPY. <sup>100</sup>                                                                                                                  | Often used with other moieties              |
| chlorine (propyl chloride)                                              | Covalent bond            | Chlorine is suspected to bind to the chlorine pump in the ER                                                                      | Fluorene derivative, <sup>101</sup> Nile Red derivative. <sup>98</sup>                                                                                                                                                                                                                                          | Selective to ER                             |



|                                 |                                                          |                                                                                                                                                                                                                                |                                                                                                                                                                              |                                               |
|---------------------------------|----------------------------------------------------------|--------------------------------------------------------------------------------------------------------------------------------------------------------------------------------------------------------------------------------|------------------------------------------------------------------------------------------------------------------------------------------------------------------------------|-----------------------------------------------|
| Fluorinated hydrophobic rhodols | Fluorinated hydrophobic rhodols (inherently fluorescent) | Unknown, suggested that hydrophobic and amphipathic properties allow localisation in cholesterol-poor ER membranes                                                                                                             | p-aminophenol; <sup>102</sup> electrophilic nitrofurans; <sup>103</sup> coumarin-3-carboxylic acid; <sup>104</sup> chloroalkane, sulfonylfluoride, thioester. <sup>105</sup> | Selective to ER                               |
| Fluorescent dansyl group        | N/A                                                      | Targeting mechanism of the dansyl group is not explained, but sulfonamide could play a role. Self-assembled NPs were observed to localize into the ER of HeLa cervical cancer cells after internalisation via macropinocytosis | Nanoparticle. <sup>106</sup>                                                                                                                                                 | Some mitochondrial localisation also observed |
| l-homoarginine                  | Membrane interaction                                     | Crescent shaped peptide assemblies interact with synthetic lipid membranes. As ER is the largest membranous structure in cells, design allows ER targeting.                                                                    | Nanoparticle. <sup>107</sup>                                                                                                                                                 | Some green fluorescence in HeLa cell membrane |
| Ceramide                        | Lipid                                                    | Lipid inserts into the membrane of the ER (and Golgi)                                                                                                                                                                          | Trans-cyclooctene (to undergo tetrazine click reaction with silicon rhodamine). <sup>108</sup>                                                                               | Also targets the Golgi                        |

## Golgi apparatus

Table S15: Targeting groups for endogenous fluorescent cargo to Golgi apparatus

| Structure of targeting group       | Class of targeting group | Mechanism                                                      | Cargo / Examples                                 | Selectivity                                                                         |
|------------------------------------|--------------------------|----------------------------------------------------------------|--------------------------------------------------|-------------------------------------------------------------------------------------|
| N-acetylgalactos-aminyltransferase | Protein                  | Cargo is attached to a native Golgi enzyme.                    | GFP, <sup>109</sup> RFP. <sup>110</sup>          | Selective for Golgi (used in commercial stains).                                    |
| B4GALT1                            | Protein                  | Cargo is attached to a native Golgi enzyme.                    | GFP. <sup>19</sup>                               | Selective for Golgi                                                                 |
| SXYQRL                             | Peptide                  | Cargo is attached to sequence from native Golgi protein TGN38. | Glycophorin A (confirmed via immunofluorescence) | Selective for Golgi; note that cargo and TGN38 are both integral membrane proteins. |

B4GALT1 = Beta-1,4-Galactosyltransferase 1; TGN38 = trans-Golgi network integral membrane protein 38.

Table S16: Targeting groups for exogenous fluorescent cargo to Golgi apparatus

| Structure of targeting group | Class of targeting group               | Mechanism                                                                                                                                                                                                                                                                                                                 | Cargo / Examples                                                                                                                                        | Selectivity                                                                                                            |
|------------------------------|----------------------------------------|---------------------------------------------------------------------------------------------------------------------------------------------------------------------------------------------------------------------------------------------------------------------------------------------------------------------------|---------------------------------------------------------------------------------------------------------------------------------------------------------|------------------------------------------------------------------------------------------------------------------------|
| Ceramide / sphingosine       | Lipid                                  | Stains the Golgi apparatus of fixed and live cells, most likely through interaction(s) with endogenous lipids and cholesterol. Fluorescence emission maxima strongly dependent upon the molar density of the probes in the membrane. (Primary part of sphingolipids that composes the skeleton targeting motif.)          | BODIPY, <sup>111</sup> 4-nitrobenzo-2-oxa-1,3-diazole, <sup>112</sup> silicon-rhodamine, <sup>113</sup> rhodamine B. <sup>114</sup>                     | Generally selective staining of Golgi apparatus, though some labeling of other intracellular membranes may also occur. |
| SDYQRL                       | Trans golgi network localising peptide | The sequence SXYQRL is a retention signal for proteins residing in the trans-Golgi network                                                                                                                                                                                                                                | BODIPY. <sup>13</sup>                                                                                                                                   | Selective staining of Golgi                                                                                            |
| Indomethacin                 | Drug                                   | Indomethacin binds to COX-2 which is overexpressed in cancer cell lines and accumulates significantly in the Golgi apparatus.                                                                                                                                                                                             | acenaphtho[1,2-b]quinoxaline. <sup>115</sup>                                                                                                            | Selective staining of Golgi in cancer cell lines but no staining was observed in COS-7 cells and HEK 293 cells         |
| L-Cysteine                   | Amino acid                             | Mimicking cysteine residues in Golgi apparatus localized galactosyltransferase and protein kinase D; while the mechanism has not been fully elucidated, the authors noted the necessity of free thiol groups for targeting and suggested they may bind to the sulfhydryl receptor site via formation of disulphide bonds. | Fluorescein, <i>meso</i> -tetra(4-carboxyphenyl)porphine, silica nanoparticles, quantum dots; <sup>116</sup> Near infra-red hemicyanine. <sup>117</sup> | Selective staining of Golgi.                                                                                           |

COX-2 = Cyclooxygenase-2, COS-7 = CV-1 (simian) in origin and carrying SV40 genetic material cell line, HEK 293 = human embryonic kidney 293

## Lipid droplets

Table S17: Targeting groups for endogenous fluorescent cargo to lipid droplets

| Structure of targeting group | Class of targeting group | Mechanism                                   | Cargo / Examples    | Selectivity                     |
|------------------------------|--------------------------|---------------------------------------------|---------------------|---------------------------------|
| Perilipin-3                  | Protein                  | Cargo is attached to a LD membrane protein. | GFP. <sup>118</sup> | Selective for LD membrane only. |

Table S18: Targeting groups for exogenous fluorescent cargo to lipid droplets

| Structure of targeting group | Class of targeting group                | Mechanism                                                                                                               | Cargo / Examples                                        | Selectivity                                        |
|------------------------------|-----------------------------------------|-------------------------------------------------------------------------------------------------------------------------|---------------------------------------------------------|----------------------------------------------------|
| N/A                          | Highly conjugated lipophilic structures | Solvatochromic shift and/or fluorogenic turn on in non-polar hydrophobic environments compared to aqueous environments. | Nile Red, <sup>119</sup> BODIPY 493/503. <sup>120</sup> | May also stain intracellular and plasma membranes. |
| Cyclohexyl rings             | Alkyl rings                             | Improves affinity for LD core compared to the membrane.                                                                 | Merocyanine, <sup>121</sup> Nile Red. <sup>98</sup>     | Selective staining for LD core.                    |

# Plasma membrane

Table S19: Targeting groups for endogenous fluorescent cargo to the plasma membrane

| Structure of targeting group                                              | Class of targeting group   | Mechanism                                                                                                              | Cargo / Examples                             | Selectivity                   |
|---------------------------------------------------------------------------|----------------------------|------------------------------------------------------------------------------------------------------------------------|----------------------------------------------|-------------------------------|
| myristoylation/<br>palmitoylation<br>sequence from Lck<br>tyrosine kinase | Palmitoylation<br>sequence | Palmitoylation is a common post-translational modification used to attach fluorescent proteins to the plasma membrane. | GFP, <sup>122, 123</sup> RFP. <sup>124</sup> | Selective to plasma membrane. |
| palmitoylation<br>sequence from<br>GAP43                                  | Palmitoylation<br>sequence | Palmitoylation is a common post-translational modification used to attach fluorescent proteins to the plasma membrane. | GFP. <sup>125</sup>                          | Selective to plasma membrane. |

GAP43 = Growth Associated Protein 43

Table S20: Targeting groups for exogenous fluorescent cargo to the plasma membrane

| Structure of targeting group             | Class of targeting group   | Mechanism                                                                                               | Cargo / Examples                                                   | Selectivity                                        |
|------------------------------------------|----------------------------|---------------------------------------------------------------------------------------------------------|--------------------------------------------------------------------|----------------------------------------------------|
| Long hydrocarbon<br>tail and polar heads | Membrane lipid<br>mimic    | Can insert into plasma membrane due to similarity in structure to existing phospholipids.               | Laurdan, <sup>126</sup> Prodan, <sup>127</sup> DiI. <sup>128</sup> | Selective to plasma membrane.                      |
| Cholesterol                              | Membrane lipid<br>mimic    | Fluorescent analogue of membrane lipids will have similar activity to the unmodified lipid              | Chloestatrienol. <sup>129</sup>                                    | May be incorporated into other compartments.       |
| methotrexate                             | Ligand-directed            | Small molecule ligand (methotrexate) can bind to plasma membrane protein (folate).                      | Fluorescein. <sup>130</sup>                                        | Selective to plasma membrane.                      |
| carbetocin                               | Ligand-directed            | Small molecule ligand (carbotoxin) can bind to plasma membrane protein (oxytocin).                      | Nile Red. <sup>131</sup>                                           | Selective to plasma membrane.                      |
| aptamer sgc8 and<br>optimised forms      | DNA activatable<br>aptamer | DNA aptamer (sgc8) can interact with membrane protein (tyrosine kinase-7)                               | 6-carboxyfluorescein, Cy5. <sup>132</sup>                          | Selective to plasma membrane.                      |
| DPA-Zn                                   | Phospholipid<br>binder     | DPA-Zn will selectively bind externalised phosphatidylserine via intramolecular indicator displacement. | Coumarin. <sup>133</sup>                                           | Selectively stains membrane during apoptosis only. |

DPA-Zn = bis(zinc-dipicolylamine).

# Cytoskeleton

Table S21: Targeting groups for endogenous fluorescent cargo to the cytoskeleton

| Structure of targeting group                                               | Class of targeting group     | Mechanism                                                    | Cargo / Examples                                               | Selectivity                     |
|----------------------------------------------------------------------------|------------------------------|--------------------------------------------------------------|----------------------------------------------------------------|---------------------------------|
| $\alpha$ -tubulin                                                          | Protein                      | Labelled protein monomers are incorporated into microtubules | GFP1. <sup>134</sup>                                           | Selective for $\alpha$ -tubulin |
| $\beta$ -tubulin                                                           | Protein                      | Labelled protein monomers are incorporated into microtubules | GFP 11, <sup>135</sup> GFP, <sup>136</sup> RFP. <sup>137</sup> | Selective for $\beta$ -tubulin  |
| Talin                                                                      | Protein                      | Protein associated with focal adhesions                      | GFP, <sup>136</sup> RFP <sup>138</sup>                         | Selective for talin             |
| phospho-deficient version of the microtubule-binding domain of Tau (mTMBD) | Cytoskeletal binding protein | Protein binds to microtubules                                | mCherry. <sup>139</sup>                                        | Selective for microtubules      |
| $\beta$ -actin                                                             | Cytoskeletal protein         | Labelled protein monomers are incorporated into actin fibres | GFP, <sup>140, 141</sup> RFP. <sup>142</sup>                   | Selective for actin             |

Table S22: Targeting groups for exogenous fluorescent cargo to the cytoskeleton

| Structure of targeting group | Class of targeting group | Mechanism                                                                                                   | Cargo / Examples                                                                                                       | Selectivity                                                                                                                                            |
|------------------------------|--------------------------|-------------------------------------------------------------------------------------------------------------|------------------------------------------------------------------------------------------------------------------------|--------------------------------------------------------------------------------------------------------------------------------------------------------|
| jasplakinolide               | F-Actin-binding ligand   | Jasplakinolide binds to and stabilises actin dimers                                                         | Silicon-rhodamine, <sup>143</sup> rhodamine derivative (MaP55). <sup>144</sup>                                         | For SiR, selective in 5/10 cell lines from 5 organisms and 4/10 showed improved staining after verapamil addition. For MaP55, selective in U2OS cells. |
| docetaxel                    | Tubulin binding ligand   | docetaxel binds to a hydrophobic pocket on $\beta$ -tubulin                                                 | Silicon-rhodamine, <sup>143</sup> rhodamine derivative (MaP55), <sup>144</sup> Tubulin Tracker Deep Red. <sup>25</sup> | Generally selective for tubulin.                                                                                                                       |
| paclitaxel / taxol           | Tubulin binding ligand   | Targets tubulin                                                                                             | Oregon Green 488, BODIPY 564/570, Tubulin Tracker Green. <sup>25</sup>                                                 | Generally selective for actin.                                                                                                                         |
| phalloidin                   | F-Actin-binding ligand   | Phalloidin binds specifically at the interface between F-actin subunits, locking adjacent subunits together | TRITC. <sup>145</sup>                                                                                                  | Generally selective for actin.                                                                                                                         |

# Cytosol

Table S23: Targeting groups for endogenous fluorescent cargo to the cytosol

| <b>Structure of targeting group</b> | <b>Class of targeting group</b> | <b>Mechanism</b>                                                                                          | <b>Cargo / Examples</b>  | <b>Selectivity</b>                                   |
|-------------------------------------|---------------------------------|-----------------------------------------------------------------------------------------------------------|--------------------------|------------------------------------------------------|
| SELQNKLEELDLDSYK                    | Nuclear export sequence (NES)   | NES is appended onto proteins for export through the NPC, thus preventing passive diffusion of small FPs. | mScarlet. <sup>146</sup> | Allows cytosolic retention, prevents nuclear uptake. |

## References

1. *CellLight™ Nucleus-GFP, BacMam 2.0*, C10602, Thermo Fisher Scientific, <https://www.thermofisher.com/order/catalog/product/C10602#/C10602>, (accessed June 12, 2021).
2. *CellLight™ Nucleus-RFP, BacMam 2.0*, C10603, Thermo Fisher Scientific, <https://www.thermofisher.com/order/catalog/product/C10603#/C10603>, (accessed June 12, 2021).
3. *CellLight™ Nucleus-CFP, BacMam 2.0*, C10616, Thermo Fisher Scientific, <https://www.thermofisher.com/order/catalog/product/C10616#/C10616>, (accessed June 12, 2021).
4. *CellLight™ Histone 2B-GFP, BacMam 2.0*, C10594, Thermo Fisher Scientific, <https://www.thermofisher.com/order/catalog/product/C10594#/C10594>, (accessed June 12, 2021).
5. *CellLight™ Histone 2B-RFP, BacMam 2.0*, C10595, Thermo Fisher Scientific, <https://www.thermofisher.com/order/catalog/product/C10595#/C10595>, (accessed June 12, 2021).
6. D. Kamiyama, S. Sekine, B. Barsi-Rhyne, J. Hu, B. Chen, L. A. Gilbert, H. Ishikawa, M. D. Leonetti, W. F. Marshall, J. S. Weissman and B. Huang, *Nature Communications*, 2016, **7**, 11046.
7. M. Ishida, H. Watanabe, K. Takigawa, Y. Kurishita, C. Oki, A. Nakamura, I. Hamachi and S. Tsukiji, *Journal of the American Chemical Society*, 2013, **135**, 12684-12689.
8. X. Zhang, Z. Ye, X. Zhang, H. Man, Z. Huang, N. Li and Y. Xiao, *Chemical Communications*, 2019, **55**, 1951-1954.
9. J. Bucevicius, J. Keller-Findeisen, T. Gilat, S. W. Hell and G. Lukinavicius, *Chemical Science*, 2019, **10**, 1962-1970.
10. A. Nakamura, K. Takigawa, Y. Kurishita, K. Kuwata, M. Ishida, Y. Shimoda, I. Hamachi and S. Tsukiji, *Chemical Communications*, 2014, **50**, 6149-6152.
11. K. N. Wang, L. Y. Liu, D. Mao, S. Xu, C. P. Tan, Q. Cao, Z. W. Mao and B. Liu, *Angew. Chem.*, 2021, DOI: 10.1002/anie.202104163.
12. M. Ikeda, H. Nakagawa, S. Ban, H. Tsumoto, T. Suzuki and N. Miyata, *Free Radical Biol. Med.*, 2010, **49**, 1792-1797.
13. E. H. Pap, T. B. Dansen, R. van Summeren and K. W. Wirtz, *Exp. Cell Res.*, 2001, **265**, 288-293.
14. A. Gronewold, M. Horn and I. Neundorff, *Beilstein Journal of Organic Chemistry*, 2018, **14**, 1378-1388.
15. Y. Wen, K. Liu, H. Yang, Y. Li, H. Lan, Y. Liu, X. Zhang and T. Yi, *Analytical Chemistry*, 2014, **86**, 9970-9976.
16. Y. Cheng, C. Sun, R. Liu, J. Yang, J. Dai, T. Zhai, X. Lou and F. Xia, *Angew. Chem.*, 2019, **58**, 5049-5053.
17. Y. Cheng, C. Sun, X. Ou, B. Liu, X. Lou and F. Xia, *Chemical Science*, 2017, **8**, 4571-4578.
18. M. Saito and H. Saitoh, *Biosci., Biotechnol., Biochem.*, 2012, **76**, 1777-1780.
19. J. Llopis, J. M. McCaffery, A. Miyawaki, M. G. Farquhar and R. Y. Tsien, *Proceedings of the National Academy of Sciences*, 1998, **95**, 6803.
20. R. Rizzuto, M. Brini, P. Pizzo, M. Murgia and T. Pozzan, *Curr. Biol.*, 1995, **5**, 635-642.
21. J. R. Friedman, L. L. Lackner, M. West, J. R. DiBenedetto, J. Nunnari and G. K. Voeltz, *Science*, 2011, **334**, 358.
22. A. Baracca, G. Sgarbi, G. Solaini and G. Lenaz, *Biochimica et Biophysica Acta (BBA) - Bioenergetics*, 2003, **1606**, 137-146.
23. L. Scorrano, V. Petronilli, R. Colonna, F. Di Lisa and P. Bernardi, *Journal of Biological Chemistry*, 1999, **274**, 24657-24663.
24. T. Minamikawa, A. Sriratana, D. A. Williams, D. N. Bowser, J. S. Hill and P. Nagley, *Journal of Cell Science*, 1999, **112**, 2419-2430.
25. *The Molecular Probes® Handbook*, Life Technologies, 11 edn., 2010.
26. J. Zielonka, J. Joseph, A. Sikora, M. Hardy, O. Ouari, J. Vasquez-Vivar, G. Cheng, M. Lopez and B. Kalyanaraman, *Chemical Reviews*, 2017, **117**, 10043-10120.
27. Y. L. Pak, J. Li, K. C. Ko, G. Kim, J. Y. Lee and J. Yoon, *Analytical Chemistry*, 2016, **88**, 5476-5481.

28. J. Miao, Y. Huo, Q. Liu, Z. Li, H. Shi, Y. Shi and W. Guo, *Biomaterials*, 2016, **107**, 33-43.
29. S. S. Denisov, E. A. Kotova, E. Y. Plotnikov, A. A. Tikhonov, D. B. Zorov, G. A. Korshunova and Y. N. Antonenko, *Chemical Communications*, 2014, **50**, 15366-15369.
30. A. Kaur, K. W. L. Brigden, T. F. Cashman, S. T. Fraser and E. J. New, *Organic & Biomolecular Chemistry*, 2015, **13**, 6686-6689.
31. F. Du, Y. Min, F. Zeng, C. Yu and S. Wu, *Small*, 2014, **10**, 964-972.
32. S. Marrache and S. Dhar, *Proceedings of the National Academy of Sciences*, 2012, **109**, 16288-16293.
33. G. G. M. D'Souza, S.-M. Cheng, S. V. Boddapati, R. W. Horobin and V. Weissig, *J. Drug Targeting*, 2008, **16**, 578-585.
34. H. He, D.-W. Li, L.-Y. Yang, L. Fu, X.-J. Zhu, W.-K. Wong, F.-L. Jiang and Y. Liu, *Scientific Reports*, 2015, **5**, 13543.
35. Z. Hu, Y. Sim, O. L. Kon, W. H. Ng, A. J. Ribeiro, M. J. Ramos, P. A. Fernandes, R. Ganguly, B. Xing, F. Garcia and E. K. Yeow, *Bioconjugate Chem.*, 2017, **28**, 590-599.
36. C. A. Kulkarni, B. D. Fink, B. E. Gibbs, P. R. Chheda, M. Wu, W. I. Sivitz and R. J. Kerns, *J. Med. Chem.*, 2021, **64**, 662-676.
37. I. Berezowska, N. N. Chung, C. Lemieux, B. Zelent, H. H. Szeto and P. W. Schiller, *Peptides*, 2003, **24**, 1195-1200.
38. A. V. Birk, S. Liu, Y. Soong, W. Mills, P. Singh, J. D. Warren, S. V. Seshan, J. D. Pardee and H. H. Szeto, *J. Am. Soc. Nephrol.*, 2013, **24**, 1250-1261.
39. K. L. Horton, K. M. Stewart, S. B. Fonseca, Q. Guo and S. O. Kelley, *Chemistry & Biology*, 2008, **15**, 375-382.
40. T. Zhao, X. Liu, S. Singh, X. Liu, Y. Zhang, J. Sawada, M. Komatsu and K. D. Belfield, *Bioconjugate Chem.*, 2019, **30**, 2312-2316.
41. *CellLight™ Lysosomes-GFP, BacMam 2.0*, C10596, Thermo Fisher Scientific, <https://www.thermofisher.com/order/catalog/product/C10596#/C10596>, (accessed June 12, 2021).
42. *CellLight™ Lysosomes-RFP, BacMam 2.0*, C10597, Thermo Fisher Scientific, <https://www.thermofisher.com/order/catalog/product/C10597#/C10597>, (accessed June 12, 2021).
43. N. M. Sherer, M. J. Lehmann, L. F. Jimenez-Soto, A. Ingmundson, S. M. Horner, G. Cicchetti, P. G. Allen, M. Pypaert, J. M. Cunningham and W. Mothes, *Traffic*, 2003, **4**, 785-801.
44. A. L. Ambrosio, J. A. Boyle and S. M. Di Pietro, *Blood*, 2012, **120**, 4072-4081.
45. Z. D'Souza, J. B. Blackburn, T. Kudlyk, I. D. Pokrovskaya and V. V. Lupashin, *Frontiers in Cell and Developmental Biology*, 2019, **7**.
46. H. S. Lv, S. Y. Huang, B. X. Zhao and J. Y. Miao, *Anal. Chim. Acta*, 2013, **788**, 177-182.
47. S. D. Wiedner, L. N. Anderson, N. C. Sadler, W. B. Chrisler, V. K. Kodali, R. D. Smith and A. T. Wright, *Angew. Chem.*, 2014, **53**, 2919-2922.
48. N. B. Yapici, Y. Bi, P. Li, X. Chen, X. Yan, S. R. Mandalapu, M. Faucett, S. Jockusch, J. Ju, K. M. Gibson, W. J. Pavan and L. Bi, *Scientific Reports*, 2015, **5**, e8576.
49. X. Chen, Y. Bi, T. Wang, P. Li, X. Yan, S. Hou, C. E. Bammert, J. Ju, K. M. Gibson, W. J. Pavan and L. Bi, *Scientific Reports*, 2015, **5**, 9004.
50. H. Zhu, J. Fan, Q. Xu, H. Li, J. Wang, P. Gao and X. Peng, *Chemical Communications*, 2012, **48**, 11766-11768.
51. X. Wang, L. Fan, Y. Wang, C. Zhang, W. Liang, S. Shuang and C. Dong, *Journal of Materials Chemistry B*, 2020, **8**, 1466-1471.
52. J. Ge, L. Fan, K. Zhang, T. Ou, Y. Li, C. Zhang, C. Dong, S. Shuang and M. S. Wong, *Sensors and Actuators B: Chemical*, 2018, **262**, 913-921.
53. X.-d. Wang, L. Fan, J.-y. Ge, F. Li, C.-h. Zhang, J.-j. Wang, S.-m. Shuang and C. Dong, *Spectrochimica Acta Part A: Molecular and Biomolecular Spectroscopy*, 2019, **221**, 117175.
54. Q. Xia, S. Feng, J. Hong and G. Feng, *Talanta*, 2021, **228**, 122184.
55. F. Fan, S. Nie, D. Yang, M. Luo, H. Shi and Y. H. Zhang, *Bioconjugate Chem.*, 2012, **23**, 1309-1317.
56. Y. Han, M. Li, F. Qiu, M. Zhang and Y. H. Zhang, *Nature Communications*, 2017, **8**, 1307.
57. D. Pan, Z. Hu, F. Qiu, Z. L. Huang, Y. Ma, Y. Wang, L. Qin, Z. Zhang, S. Zeng and Y. H. Zhang, *Nature Communications*, 2014, **5**, 5573.



58. W. I. Lencer, P. Weyer, A. S. Verkman, D. A. Ausiello and D. Brown, *Am. J. Physiol.*, 1990, **258**, C309-317.
59. *CellLight™ Early Endosomes-GFP, BacMam 2.0*, C10586, Thermo Fisher Scientific, <https://www.thermofisher.com/order/catalog/product/C10586#/C10586>, (accessed June 12, 2021).
60. *CellLight™ Early Endosomes-RFP, BacMam 2.0*, C10587, Thermo Fisher Scientific, <https://www.thermofisher.com/order/catalog/product/C10587#/C10587>, (accessed June 12, 2021).
61. *CellLight™ Late Endosomes-GFP, BacMam 2.0*, C10588, Thermo Fisher Scientific, <https://www.thermofisher.com/order/catalog/product/C10588#/C10588>, (accessed June 12, 2021).
62. *CellLight™ Late Endosomes-RFP, BacMam 2.0*, C10589, Thermo Fisher Scientific, <https://www.thermofisher.com/order/catalog/product/C10589#/C10589>, (accessed June 12, 2021).
63. D. Sheff, L. Pelletier, C. B. O'Connell, G. Warren and I. Mellman *Journal of Cell Biology*, 2002, **156**, 797-804.
64. A. Choudhury, M. Dominguez, V. Puri, D. K. Sharma, K. Narita, C. L. Wheatley, D. L. Marks and R. E. Pagano, *The Journal of Clinical Investigation*, 2002, **109**, 1541-1550.
65. T. Bergeland, L. Haugen, O. J. B. Landsverk, H. Stenmark and O. Bakke, *EMBO reports*, 2008, **9**, 171-178.
66. A. Burtey, M. Wagner, E. Hodneland, K. O. Skaftnesmo, J. Schoelermann, I. R. Mondragon, H. Espedal, A. Golebiewska, S. P. Niclou, R. Bjerkvig, T. Kögel and H.-H. Gerdes, *The FASEB Journal*, 2015, **29**, 4695-4712.
67. G. Montagnac, H. de Forges, E. Smythe, C. Gueudry, M. Romao, J. Salamero and P. Chavrier, *Curr. Biol.*, 2011, **21**, 574-579.
68. F. Piazzolla, V. Mercier, L. Assies, N. Sakai, A. Roux and S. Matile, *Angew. Chem.*, 2021, **60**, 12258-12263.
69. A. Sampedro, R. Villalonga-Planells, M. Vega, G. Ramis, S. Fernandez de Mattos, P. Villalonga, A. Costa and C. Rotger, *Bioconjugate Chem.*, 2014, **25**, 1537-1546.
70. F. Miao, S. Uchinomiya, Y. Ni, Y. T. Chang and J. Wu, *ChemPlusChem*, 2016, **81**, 1209-1215.
71. A. Gupta, F. Rivera-Molina, Z. Xi, D. Toomre and A. Schepartz, *Nature Chemical Biology*, 2020, **16**, 408-414.
72. E. Itakura and N. Mizushima, *Autophagy*, 2010, **6**, 764-776.
73. R. Le Bars, J. Marion, R. Le Borgne, B. Satiat-Jeuemaitre and M. W. Bianchi, *Nature Communications*, 2014, **5**, 4121.
74. A. S. Löffler, S. Alers, A. M. Dieterle, H. Keppeler, M. Franz-Wachtel, M. Kundu, D. G. Campbell, S. Wesselborg, D. R. Alessi and B. Stork, *Autophagy*, 2011, **7**, 696-706.
75. S. Kimura, T. Noda and T. Yoshimori, *Autophagy*, 2007, **3**, 452-460.
76. E. Itakura, C. Kishi-Itakura and N. Mizushima, *Cell*, 2012, **151**, 1256-1269.
77. K. Tsuboyama, I. Koyama-Honda, Y. Sakamaki, M. Koike, H. Morishita and N. Mizushima, *Science*, 2016, **354**, 1036-1041.
78. S. Guo, Y. Liang, S. F. Murphy, A. Huang, H. Shen, D. F. Kelly, P. Sobrado and Z. Sheng, *Autophagy*, 2015, **11**, 560-572.
79. H. Iwashita, H. T. Sakurai, N. Nagahora, M. Ishiyama, K. Shioji, K. Sasamoto, K. Okuma, S. Shimizu and Y. Ueno, *FEBS Letters*, 2018, **592**, 559-567.
80. J. Jiang, X. Tian, C. Xu, S. Wang, Y. Feng, M. Chen, H. Yu, M. Zhu and X. Meng, *Chemical Communications*, 2017, **53**, 3645-3648.
81. P. Ning, L. Hou, Y. Feng, G. Xu, Y. Bai, H. Yu and X. Meng, *Chemical Communications*, 2019, **55**, 1782-1785.
82. *CellLight™ Peroxisome-GFP, BacMam 2.0*, C10604, Thermo Fisher Scientific, <https://www.thermofisher.com/order/catalog/product/C10604#/C10604>, (accessed June 12, 2021).
83. T. Yano, M. Oku, N. Akeyama, A. Itoyama, H. Yurimoto, S. Kuge, Y. Fujiki and Y. Sakai, *Mol. Cell. Biol.*, 2010, **30**, 3758-3766.
84. I. Drago, M. Giacomello, P. Pizzo and T. Pozzan, *Journal of Biological Chemistry*, 2008, **283**, 14384-14390.
85. T. B. Dansen, E. H. W. Pap, R. J. Wanders and K. W. Wirtz, *The Histochemical Journal*, 2001, **33**, 65-69.

86. M. J. Dayel, E. F. Y. Hom and A. S. Verkman, *Biophysical Journal*, 1999, **76**, 2843-2851.
87. *CellLight™ ER-GFP, BacMam 2.0*, C10590, Thermo Fisher Scientific, <https://www.thermofisher.com/order/catalog/product/C10590#/C10590>, (accessed June 12, 2021).
88. *CellLight™ ER-RFP, BacMam 2.0*, C10590, Thermo Fisher Scientific, <https://www.thermofisher.com/order/catalog/product/C10591#/C10591>, (accessed June 12, 2021).
89. L. Fang, G. Trigiante, R. Crespo-Otero, C. S. Hawes, M. P. Philpott, C. R. Jones and M. Watkinson, *Chemical Science*, 2019, **10**, 10881-10887.
90. H. Zhang, J. Chen, H. Xiong, Y. Zhang, W. Chen, J. Sheng and X. Song, *Org Biomol Chem*, 2019, **17**, 1436-1441.
91. H. Xiao, X. Liu, C. Wu, Y. Wu, P. Li, X. Guo and B. Tang, *Biosens Bioelectron*, 2017, **91**, 449-455.
92. A. Xu, Y. Tang and W. Lin, *Spectrochimica Acta Part A: Molecular and Biomolecular Spectroscopy*, 2018, **204**, 770-776.
93. Y. Tang, A. Xu, Y. Ma, G. Xu, S. Gao and W. Lin, *Scientific Reports*, 2017, **7**, 12944.
94. W. Song, B. Dong, Y. Lu, X. Kong, A. H. Mehmood and W. Lin, *New J. Chem.*, 2019, **43**, 12103-12108.
95. Y. H. Lee, N. Park, Y. B. Park, Y. J. Hwang, C. Kang and J. S. Kim, *Chemical Communications*, 2014, **50**, 3197-3200.
96. H. Lee, Z. Yang, Y. Wi, T. W. Kim, P. Verwilt, Y. H. Lee, G.-i. Han, C. Kang and J. S. Kim, *Bioconjugate Chem.*, 2015, **26**, 2474-2480.
97. Z. Yang, Y. He, J. H. Lee, W.-S. Chae, W. X. Ren, J. H. Lee, C. Kang and J. S. Kim, *Chemical Communications*, 2014, **50**, 11672-11675.
98. D. I. Danylchuk, P. H. Jouard and A. S. Klymchenko, *Journal of the American Chemical Society*, 2021, **143**, 912-924.
99. A. Goujon, A. Colom, K. Straková, V. Mercier, D. Mahecic, S. Manley, N. Sakai, A. Roux and S. Matile, *Journal of the American Chemical Society*, 2019, **141**, 3380-3384.
100. A. R. Sekhar, B. Mallik, V. Kumar and J. Sankar, *Organic & Biomolecular Chemistry*, 2019, **17**, 3732-3736.
101. H. Zhang, J. Fan, H. Dong, S. Zhang, W. Xu, J. Wang, P. Gao and X. Peng, *Journal of Materials Chemistry B*, 2013, **1**, 5450-5455.
102. K. E. Knewton, D. Rane and B. R. Peterson, *ACS Chem. Biol.*, 2018, **13**, 2595-2602.
103. J. M. Meinig, L. Fu and B. R. Peterson, *Angew. Chem.*, 2015, **54**, 9696-9699.
104. Y. Zhao, H. Li, Z. Chai, W. Shi, X. Li and H. Ma, *Chemical Communications*, 2020, **56**, 6344-6347.
105. A. Fujisawa, T. Tamura, Y. Yasueda, K. Kuwata and I. Hamachi, *Journal of the American Chemical Society*, 2018, **140**, 17060-17070.
106. C. Ghosh, A. Nandi and S. Basu, *Nanoscale*, 2019, **11**, 3326-3335.
107. Z. Feng, H. Wang, S. Wang, Q. Zhang, X. Zhang, A. A. Rodal and B. Xu, *Journal of the American Chemical Society*, 2018, **140**, 9566-9573.
108. A. D. Thompson, J. Bewersdorf, D. Toomre and A. Schepartz, *Biochemistry*, 2017, **56**, 5194-5201.
109. *CellLight™ Golgi-GFP, BacMam 2.0*, C10592, Thermo Fisher Scientific, <https://www.thermofisher.com/order/catalog/product/C10592#/C10592>, (accessed June 12, 2021).
110. *CellLight™ Golgi-RFP, BacMam 2.0*, C10593, Thermo Fisher Scientific, <https://www.thermofisher.com/order/catalog/product/C10593#/C10593>, (accessed June 12, 2021).
111. R. E. Pagano, O. C. Martin, H. C. Kang and R. P. Haugland, *Journal of Cell Biology*, 1991, **113**, 1267-1279.
112. N. G. Lipsky and R. E. Pagano, *Proceedings of the National Academy of Sciences*, 1983, **80**, 2608-2612.
113. R. S. Erdmann, H. Takakura, A. D. Thompson, F. Rivera-Molina, E. S. Allgeyer, J. Bewersdorf, D. Toomre and A. Schepartz, *Angewandte Chemie (International ed. in English)*, 2014, **53**, 10242-10246.
114. L. Fan, X. Wang, J. Ge, F. Li, C. Zhang, B. Lin, S. Shuang and C. Dong, *Chemical Communications*, 2019, **55**, 6685-6688.
115. H. Zhang, J. Fan, J. Wang, S. Zhang, B. Dou and X. Peng, *Journal of the American Chemical Society*, 2013, **135**, 11663-11669.
116. R. S. Li, P. F. Gao, H. Z. Zhang, L. L. Zheng, C. M. Li, J. Wang, Y. F. Li, F. Liu, N. Li and C. Z. Huang, *Chemical Science*, 2017, **8**, 6829-6835.

117. P. Li, X. Guo, X. Bai, X. Wang, Q. Ding, W. Zhang, W. Zhang and B. Tang, *Analytical Chemistry*, 2019, **91**, 3382-3388.
118. S. Miura, J.-W. Gan, J. Brzostowski, M. J. Parisi, C. J. Schultz, C. Londos, B. Oliver and A. R. Kimmel, *Journal of Biological Chemistry*, 2002, **277**, 32253-32257.
119. P. Greenspan, E. P. Mayer and S. D. Fowler, *The Journal of cell biology*, 1985, **100**, 965-973.
120. P. M. Gocze and D. A. Freeman, *Cytometry*, 1994, **17**, 151-158.
121. M. Collot, T. K. Fam, P. Ashokkumar, O. Faklaris, T. Galli, L. Danglot and A. S. Klymchenko, *Journal of the American Chemical Society*, 2018, **140**, 5401-5411.
122. *CellLight™ Plasma Membrane-GFP, BacMam 2.0*, C10607, Thermo Fisher Scientific, <https://www.thermofisher.com/order/catalog/product/C10607#/C10607>, (accessed June 12, 2021).
123. A. M. Benediktsson, S. J. Schachtele, S. H. Green and M. E. Dailey, *J. Neurosci. Methods*, 2005, **141**, 41-53.
124. *CellLight™ Plasma Membrane-RFP, BacMam 2.0*, C10608, Thermo Fisher Scientific, <https://www.thermofisher.com/order/catalog/product/C10608#/C10608>, (accessed June 12, 2021).
125. T. Matsuda and C. L. Cepko, *Proceedings of the National Academy of Sciences*, 2007, **104**, 1027-1032.
126. T. Parasassi, M. Di Stefano, M. Loiero, G. Ravagnan and E. Gratton, *Biophysical Journal*, 1994, **66**, 763-768.
127. E. K. Krasnowska, E. Gratton and T. Parasassi, *Biophysical Journal*, 1998, **74**, 1984-1993.
128. C. S. von Bartheld, D. E. Cunningham and E. W. Rubel, *Journal of Histochemistry and Cytochemistry*, 1990, **38**, 725-733.
129. R. T. Fischer, F. A. Stephenson, A. Shafiee and F. Schroeder, *Chemistry and Physics of Lipids*, 1984, **36**, 1-14.
130. S. H. Fujishima, R. Yasui, T. Miki, A. Ojida and I. Hamachi, *Journal of the American Chemical Society*, 2012, **134**, 3961-3964.
131. I. A. Karpenko, R. Kreder, C. Valencia, P. Villa, C. Mendre, B. Mouillac, Y. Mely, M. Hibert, D. Bonnet and A. S. Klymchenko, *ChemBioChem*, 2014, **15**, 359-363.
132. H. Shi, X. He, K. Wang, X. Wu, X. Ye, Q. Guo, W. Tan, Z. Qing, X. Yang and B. Zhou, *Proceedings of the National Academy of Sciences*, 2011, **108**, 3900-3905.
133. V. E. Zwicker, B. L. Oliveira, J. H. Yeo, S. T. Fraser, G. J. L. Bernardes, E. J. New and K. A. Jolliffe, *Angew. Chem.*, 2019, **58**, 3087-3091.
134. M. Kimble, C. Kuzmiak, K. N. McGovern and E. L. de Hostos, *Cell Motil.*, 2000, **47**, 48-62.
135. D. Kamiyama, S. Sekine, B. Barsi-Rhyne, J. Hu, B. Chen, L. A. Gilbert, H. Ishikawa, M. D. Leonetti, W. F. Marshall, J. S. Weissman and B. Huang, *Nature Communications*, 2016, **7**, 11046.
136. *CellLight™ Tubulin-GFP, BacMam 2.0*, C10509, Thermo Fisher Scientific, <https://www.thermofisher.com/order/catalog/product/C10509#/C10509>, (accessed June 12, 2021).
137. *CellLight™ Tubulin-RFP, BacMam 2.0*, C10503, Thermo Fisher Scientific, <https://www.thermofisher.com/order/catalog/product/C10503#/C10503>, (accessed June 12, 2021).
138. *CellLight™ Talin-RFP, BacMam 2.0*, C10612, Thermo Fisher Scientific, <https://www.thermofisher.com/order/catalog/product/C10612#/C10612>, (accessed June 12, 2021).
139. P. Mooney, T. Sulerud, J. F. Pelletier, M. R. Dilsaver, M. Tomschik, C. Geisler and J. C. Gatlin, *Cytoskeleton*, 2017, **74**, 221-232.
140. L. Hodgson, W. Qiu, C. Dong and A. J. Henderson, *Biotechnol. Progr.*, 2000, **16**, 1106-1114.
141. *CellLight™ Actin-GFP, BacMam 2.0*, C10506, Thermo Fisher Scientific, <https://www.thermofisher.com/order/catalog/product/C10506#/C10506>, (accessed June 12, 2021).

142. *CellLight*<sup>TM</sup> *Actin-RFP*, *BacMam 2.0*, C10502, Thermo Fisher Scientific, <https://www.thermofisher.com/order/catalog/product/C10502#/C10502>, (accessed June 12, 2021).
143. G. Lukinavičius, L. Reymond, E. D'Este, A. Masharina, F. Göttfert, H. Ta, A. Güther, M. Fournier, S. Rizzo, H. Waldmann, C. Blaukopf, C. Sommer, D. W. Gerlich, H.-D. Arndt, S. W. Hell and K. Johnsson, *Nature Methods*, 2014, **11**, 731-733.
144. L. Wang, M. Tran, E. D'Este, J. Roberti, B. Koch, L. Xue and K. Johnsson, *Nat. Chem.*, 2020, **12**, 165-172.
145. M. L. Cano, L. Cassimeris, M. Joyce and S. H. Zigmond, *Cell Motil.*, 1992, **21**, 147-158.
146. D. S. Bindels, L. Haarbosch, L. van Weeren, M. Postma, K. E. Wiese, M. Mastop, S. Aumonier, G. Gotthard, A. Royant, M. A. Hink and T. W. J. Gadella, *Nature Methods*, 2017, **14**, 53-56.
